# Supplementary material for: Great apes distinguish true from false beliefs in an interactive helping task
Source: PLOS journal article supplement (doi:10.1371/journal.pone.0173793), 2017-04-05
Supplement: S4 (10.1371/journal.pone.0173793.s004) [file journal.pone.0173793.s004]

# Great apes distinguish true from false beliefs in an interactive helping task

## Supporting Information

David Buttelmann, Frances Buttelmann, Malinda Carpenter, Josep Call, Michael Tomasello

## Supporting Information for Study 1

### Additional Results

#### Training

Participants unlocked the boxes in empty box training trials in a minimum of 73.3% and a maximum of 100% of trials, and in box with object training trials in a minimum of 33.3% and a maximum of 100% of trials across the whole study.

#### Test

Chimpanzees unlocked the box containing the object in 75.0% of trials in the false-belief and in 51.2% of trials in the true-belief condition, bonobos did so in 66.7% and 46.7% of trials, and orangutans opened this box in 88.9% and 66.7% of trials, respectively. There were no differences between species with respect to correct performance (assuming the box with object to be correct in the false-belief condition and the empty box to be correct in the true-belief condition) [Kruskall-Wallis test,  $\chi^2(2) = .22$ ,  $p = .896$ ]. Participants showed the same pattern of results in each of the three rounds of testing (means: 1<sup>st</sup> round: 78.1% in false belief vs. 55.9% in true belief; 2<sup>nd</sup> round: 73.5% vs. 64.7%; 3<sup>rd</sup> round: 81.3% vs. 36.7%, respectively). In the 1<sup>st</sup> round this difference between conditions approached significance [Mann-Whitney  $U$  test,  $U = 91.5$ ,  $N_{false} = 16$ ,

$N_{true} = 17$ ,  $Z = -1.76$ ,  $p = .079$ ], and in the 3<sup>rd</sup> round it was significant [ $U = 48.0$ ,  $N_{false} = 16$ ,  $N_{true} = 15$ ,  $Z = -3.05$ ,  $p = .002$ ]. There were no effects of participants' sex or age.

## Supporting Information for Study 2

### Additional Results

#### Training

Participants unlocked the boxes in empty box training trials in a minimum of 63.3% and a maximum of 100% of trials, and in box with object training trials in a minimum of 76.8% and a maximum of 100% of trials.

#### Test

Chimpanzees unlocked the box containing the object in 71.3% of trials in the false-belief and in 54.3% of trials in the ignorance condition, bonobos did so in 66.7% and 29.2% of trials, and orangutans opened this box in 77.8% and 50.0% of trials, respectively. There were no differences between species with respect to correct performance [Kruskall-Wallis test,  $\chi^2(2) = .52$ ,  $p = .772$ ]. Subjects showed the same pattern of results in each of the three rounds of testing (means: 1<sup>st</sup> round: 75.0% in false belief vs. 50.0% in ignorance; 2<sup>nd</sup> round: 67.9% vs. 50.0%; 3<sup>rd</sup> round: 75.0% vs. 50.0%, respectively). However, only in the 3<sup>rd</sup> round did this difference between conditions approach significance [Mann-Whitney  $U$  test,  $U = 63.0$ ,  $N_{false} = N_{ignorance} = 14$ ,  $Z = -1.76$ ,  $p = .079$ ]. There were no effects of sex or age.

The performance of participants who had previously been tested in the true-belief and false-belief conditions in Study 1 did not differ in this study – both showed the correct pattern of responding. The apes previously tested in the false-belief condition opened the box with the object in 76.7% of trials in the false-belief and in 53.3% of trials in the ignorance condition; the means for the participants previously tested in the true-belief condition were 69.4% and 46.4% of trials, respectively.
